# Supplementary material for: Probing the B-to-Z-DNA duplex transition using terminally stacking ethynyl pyrene-modified adenosine and uridine bases
Source: Royal Society of Chemistry journal article supplement (doi:10.1039/b514079j), 2005-11-16
Supplement: b514079j.pdf [file b514079j.pdf]

## Supplementary Information

### Probing the B-to-Z-DNA Duplex Transition Using Terminally Stacking Ethyne Pyrene-Modified Adenosine and Uridine Bases

Young Jun Seo and Byeang Hyeon Kim\*

National Research Laboratory, Department of Chemistry, Division of Molecular and Life  
Sciences, Pohang University of Science and Technology, Pohang 790-784, Korea Tel:

(+82)54-279-2115, Fax: (+82)54-279-3399;

E-Mail: bhkim@postech.ac.kr

|                   |                                                                            |    |
|-------------------|----------------------------------------------------------------------------|----|
| <b>Table S1.</b>  | MALDI-TOF mass spectral data for the ODNs.                                 | S2 |
| <b>Figure S1.</b> | Melting temperature spectra of the <b>A1·N2</b> and <b>N1·N2</b> duplexes. | S3 |
| <b>Figure S2.</b> | Circular dichroism spectra of the <b>U1·N1</b> .                           | S4 |
| <b>Figure S3.</b> | Fluorescence spectra of ODN <b>C1</b> at various NaCl concentrations.      | S4 |

**Table S1.** MALDI-TOF Mass Spectral Data for the ODNs [ $M^+$ ]

| Sequence  | Calcd $m/z$ | Found $m/z$ |
|-----------|-------------|-------------|
| <b>A1</b> | 3278        | 3275        |
| <b>U1</b> | 3215        | 3214        |
| <b>N1</b> | 2741        | 2742        |
| <b>N2</b> | 2701        | 2669        |

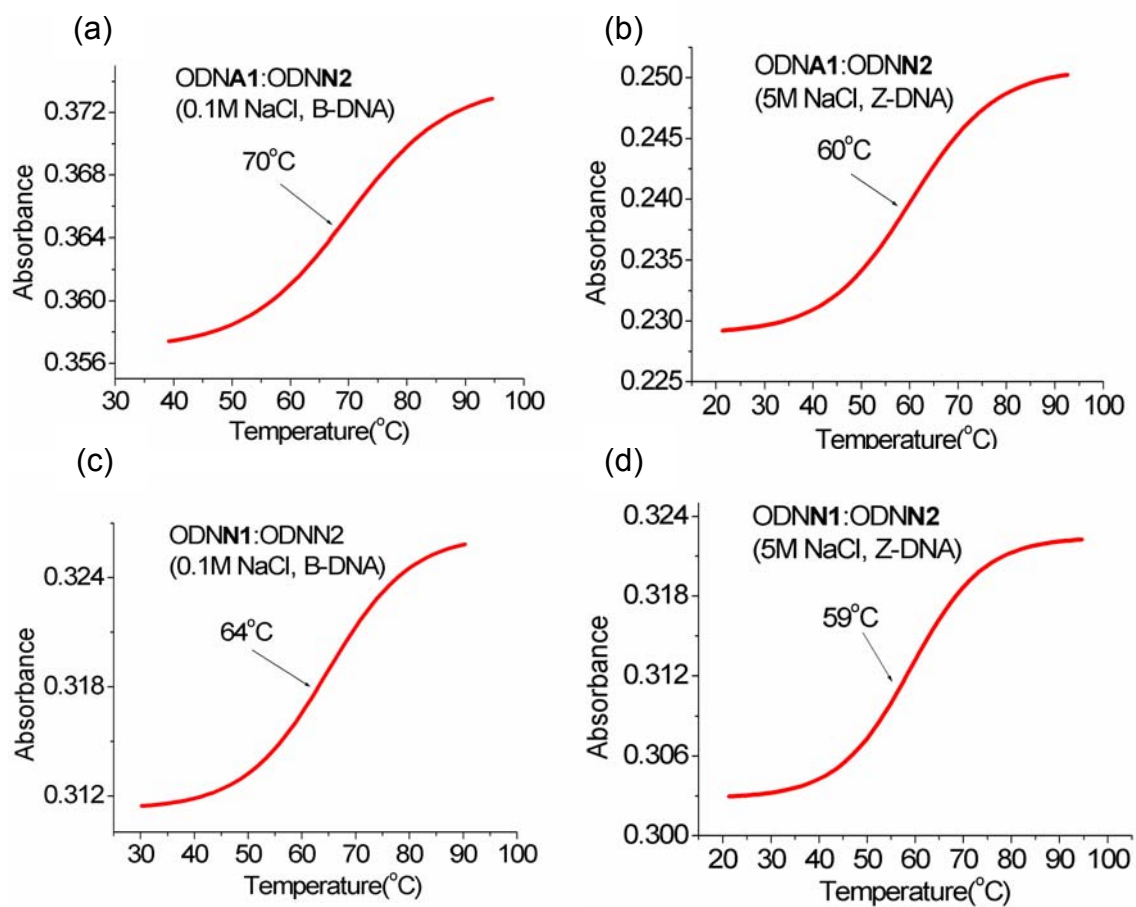

Figure S1. Melting temperature spectra of the A1·N2 and N1·N2 duplexes. The spectra were recorded at 20 °C in a buffer of 100 mM Tris-HCl (pH 7.2). Each ODN concentration was 1.5  $\mu$ M and the absorption wavelength was 260 nm.

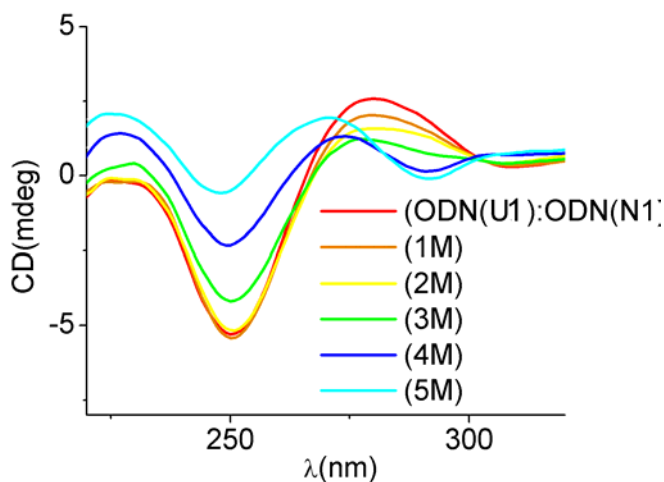

Figure S2. Circular dichroism spectra of the **U1·N1** duplex. The spectra were recorded at 20 °C in a buffer of 100 mM Tris-HCl (pH 7.2) after successively increasing the concentration of NaCl. Each ODN concentration was 1.5  $\mu$ M and the absorption wavelength was 260 nm.

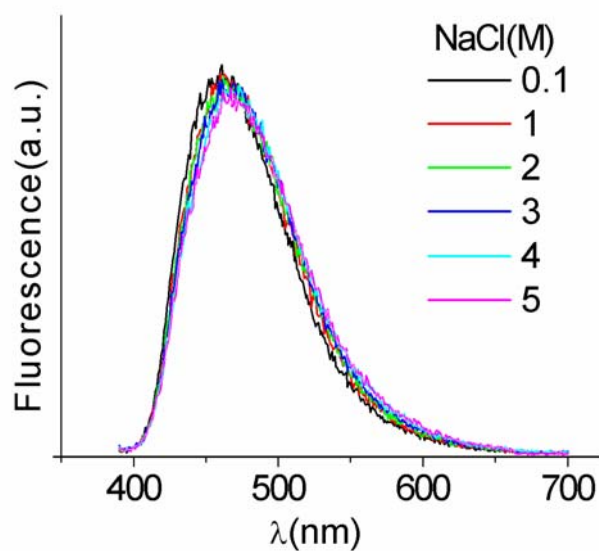

Figure S3. Fluorescence spectra of the single-stranded oligodeoxyadenylate **C1** (5'-A<sup>PY</sup> AAG TCG CAC) at various NaCl salt concentrations. These spectra were recorded at 20 °C in a buffer of 100 mM Tris-HCl (pH 7.2) at 386 nm.

This is a control experiment only to know the salt effect of the fluorophore. From this data, we know that our fluorophore material is not affected by alternating salt concentration. Therefore, it is confirmed that the fluorescence signal change of our system must be due to a B to Z conformational change of the DNA.
